# Supplementary material for: UVA, UVB and UVC Light Enhances the Biosynthesis of Phenolic Antioxidants in Fresh-Cut Carrot through a Synergistic Effect with Wounding
Source: Molecules. 2017 Apr 24;22(4):668. doi: 10.3390/molecules22040668 (PMC6154643; doi:10.3390/molecules22040668)
Supplement: Supplementary file 1 [file molecules-22-00668-s001.pdf]

## *Supplementary information*

# **UVA, UVB and UVC Light Enhances the Biosynthesis of Phenolic Antioxidants in Fresh-Cut Carrot through a Synergistic Effect with Wounding**

**Bernadeth B. Surjadinata <sup>1</sup>, Daniel A. Jacobo-Velázquez <sup>2</sup> and Luis Cisneros-Zevallos <sup>2,\*</sup>**

<sup>1</sup> Department of Horticultural Sciences, Texas A&M University, College Station, TX 77843-2133, United States; Bernadeth\_Surjadinata@bayvalleyfoods.com (B. B. Surjadinata), lcisnero@tamu.edu (L. Cisneros-Zevallos)

<sup>2</sup> Tecnológico de Monterrey, Escuela de Ingeniería y Ciencias, Centro de Biotecnología FEMSA, Av. Eugenio Garza Sada 2501 Sur, C.P. 64849 Monterrey, N.L., México; djacobov@itesm.mx (D. Jacobo-Velazquez)

\* Correspondence: lcisnero@tamu.edu; Tel.: +001-979-845-3244

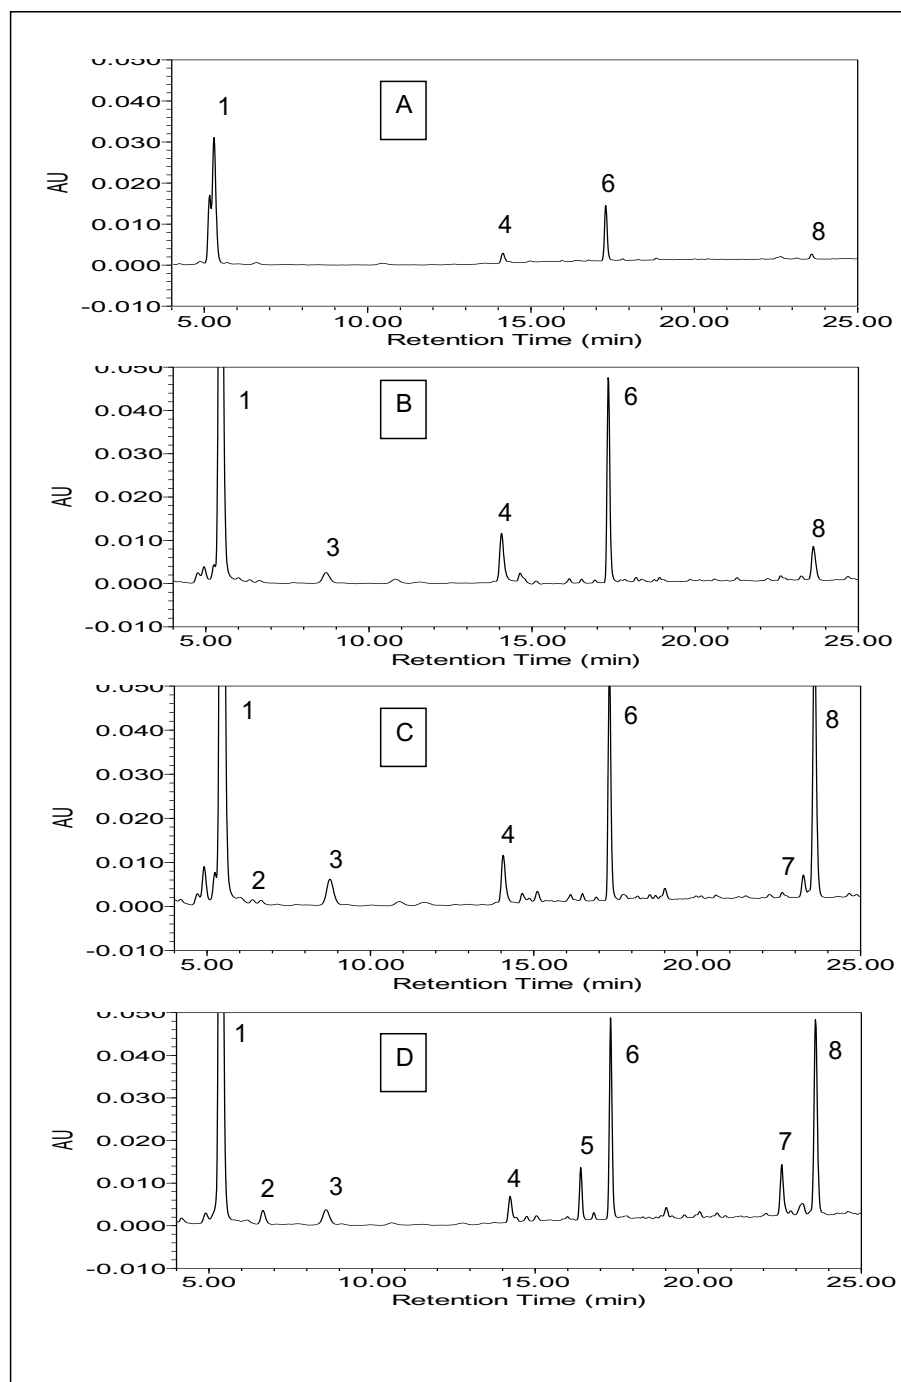

**Figure S1.** HPLC phenolic profiles of non-wounded carrots (A), slices (B), pies (C), and shreds (D) at 280 nm after 15 min of exposure to UVC (11.8 W/m<sup>2</sup>) and 4 d storage at 15°C. Peaks: 1 = chlorogenic acid (5-CQA), 2 = *p*-hydroxybenzoic acid (*p*HBA), 3 = *p*-coumaric acid derivative, 4 = ferulic acid (FA), 5 = 3,5-dicaffeoylquinic acid (3,5-diCQA), 6 = 4,5-dicaffeoylquinic acid (4,5-diCQA), 7 = hydroxybenzoic acid (HBA) derivative, 8 = isocoumarin. AU = absorbance unit.

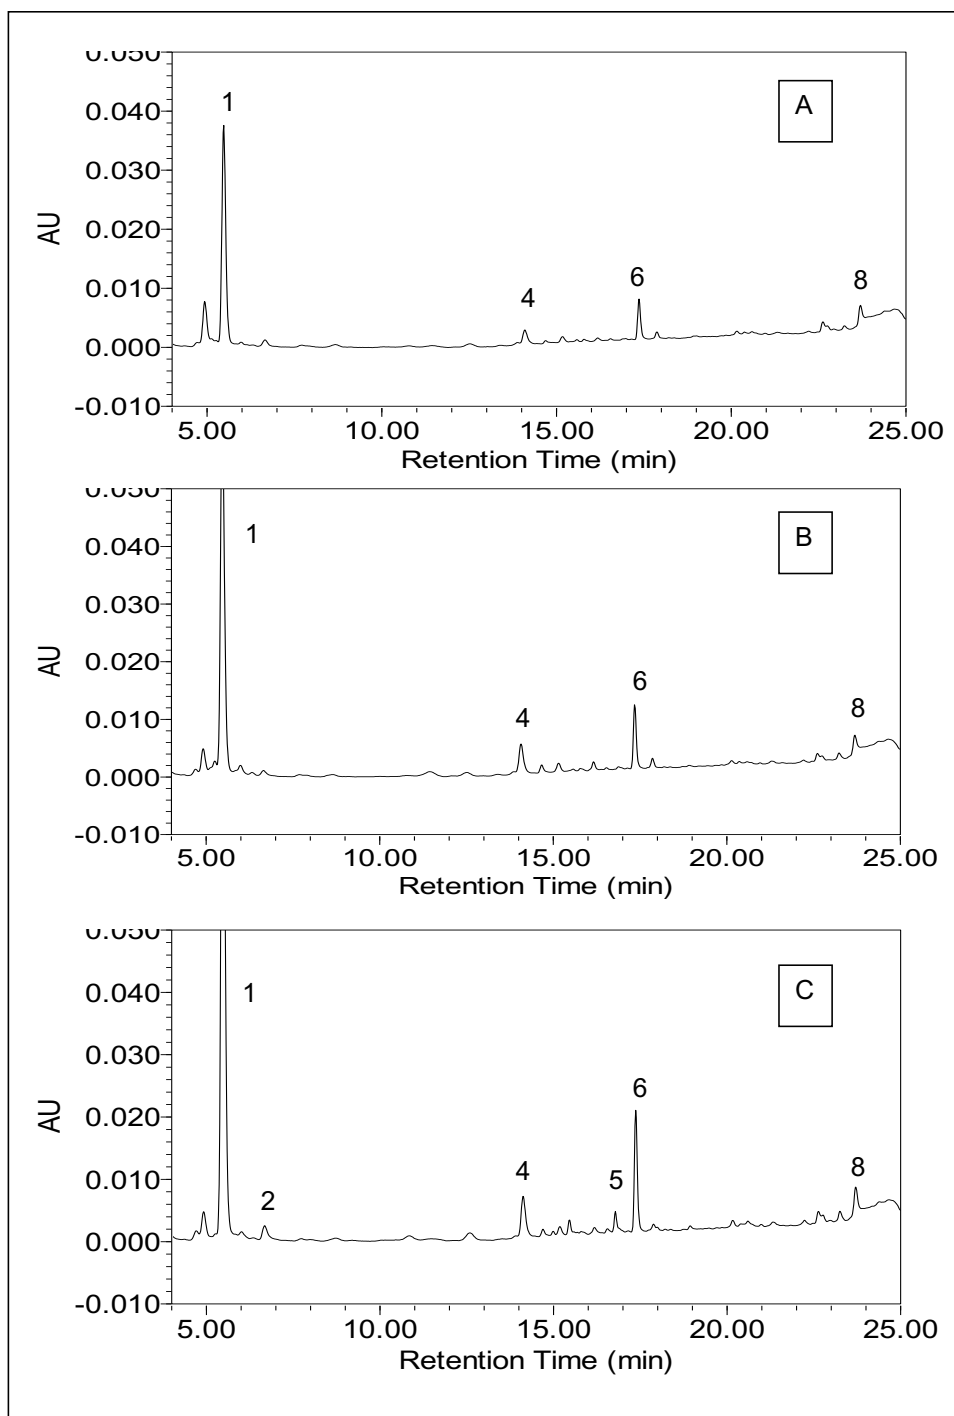

**Figure S2.** HPLC phenolic profiles of carrot pies at 280 nm after exposure to 0 min (A), 60 min (B), and 360 min (C) of UVA (12.7 W/m<sup>2</sup>). Measurements were taken after 4 d storage at 15°C. Peaks: 1 = chlorogenic acid (5-CQA), 2 = *p*-hydroxybenzoic acid (*p*HBA), 3 = *p*-coumaric acid derivative, 4 = ferulic acid (FA), 5 = 3,5-dicaffeoylquinic acid (3,5-diCQA), 6 = 4,5-dicaffeoylquinic acid (4,5-diCQA), 7 = hydroxybenzoic acid (HBA) derivative, 8 = isocoumarin. AU = absorbance unit.

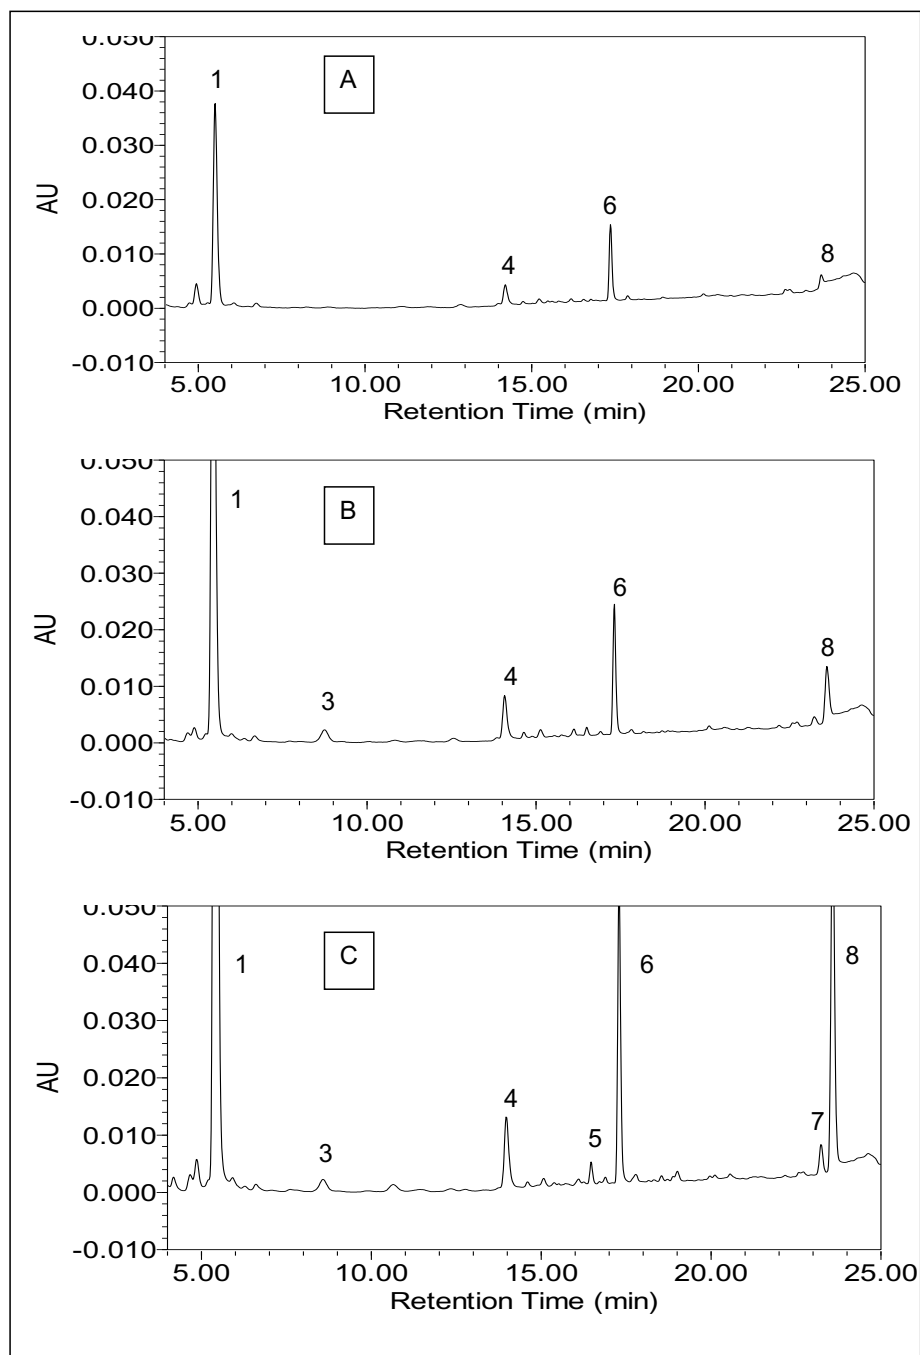

**Figure S3.** HPLC phenolic profiles of carrot pies at 280 nm after exposure to 0 min (A), 60 min (B), and 360 min (C) of UVB (10.4 W/m<sup>2</sup>). Measurements were taken after 4 d storage at 15°C. Peaks: 1 = chlorogenic acid (5-CQA), 2 = *p*-hydroxybenzoic acid (*p*HBA), 3 = *p*-coumaric acid derivative, 4 = ferulic acid (FA), 5 = 3,5-dicaffeoylquinic acid (3,5-diCQA), 6 = 4,5-dicaffeoylquinic acid (4,5-diCQA), 7 = hydroxybenzoic acid (HBA) derivative, 8 = isocoumarin. AU = absorbance unit.

**Table S1.** Individual phenolic content (mg/100g FW) of non-wounded and cut carrots exposed to UVC (11.8 W/m<sup>2</sup>). Quantification was based on HPLC profiles at 280 nm. Measurements were taken after 4 d storage at 15°C

| Peak | Compound                                               | <u>Whole radiated with UVC (min)</u> |      |      |       | <u>Slices radiated with UVC (min)</u> |       |       |       | <u>Pies radiated with UVC (min)</u> |       |       |       | <u>Shreds radiated with UVC (min)</u> |       |       |       |
|------|--------------------------------------------------------|--------------------------------------|------|------|-------|---------------------------------------|-------|-------|-------|-------------------------------------|-------|-------|-------|---------------------------------------|-------|-------|-------|
|      |                                                        | 0                                    | 0.5  | 1    | 15    | 0                                     | 0.5   | 1     | 15    | 0                                   | 0.5   | 1     | 15    | 0                                     | 0.5   | 1     | 15    |
| 1    | 5-CQA                                                  | 10.00                                | 8.45 | 9.61 | 11.17 | 12.00                                 | 26.99 | 40.80 | 52.12 | 9.21                                | 27.01 | 36.19 | 75.52 | 44.70                                 | 60.71 | 65.42 | 58.78 |
| 2    | <i>p</i> -HBA<br><i>p</i> -coumaric acid<br>derivative | nd*                                  | nd   | nd   | 0.56  | nd                                    | nd    | nd    | 0.35  | nd                                  | nd    | nd    | 1.16  | nd                                    | nd    | nd    | 1.12  |
| 3    |                                                        | nd                                   | nd   | nd   | nd    | nd                                    | nd    | nd    | 0.44  | nd                                  | nd    | nd    | 0.86  | nd                                    | nd    | nd    | 1.21  |
| 4    | FA                                                     | 1.77                                 | 1.71 | 1.83 | 1.60  | 1.95                                  | 2.25  | 2.82  | 3.24  | 1.79                                | 2.29  | 2.38  | 2.38  | 2.49                                  | 2.64  | 2.52  | 2.31  |
| 5    | 3,5-diCQA                                              | nd                                   | nd   | nd   | nd    | nd                                    | nd    | nd    | nd    | nd                                  | nd    | nd    | nd    | 4.91                                  | 5.29  | 6.03  | 5.83  |
| 6    | 4,5-diCQA                                              | 6.64                                 | 7.26 | 7.41 | 6.36  | 6.61                                  | 7.74  | 10.77 | 12.02 | 6.37                                | 8.13  | 10.19 | 12.45 | 13.23                                 | 13.57 | 14.00 | 12.27 |
| 7    | HBA derivative                                         | nd                                   | nd   | nd   | 2.10  | nd                                    | nd    | nd    | 1.44  | nd                                  | nd    | nd    | 3.44  | nd                                    | nd    | nd    | 3.58  |
| 8    | Isocoumarin                                            | 0.04                                 | 0.05 | 0.04 | 0.04  | 0.06                                  | 0.55  | 0.23  | 0.30  | 0.06                                | 0.16  | 0.92  | 1.84  | 0.59                                  | 1.07  | 1.45  | 1.31  |

\* nd = not detected

**Table S2.** Individual phenolic content (mg/100g) of non-wounded and carrot pies exposed to UVA (12.7 W/m<sup>2</sup>). Quantification was based on HPLC profiles at 280 nm. Measurements were taken after 4 d storage at 15°C.

| Peak | Compound                           | Whole | Pie-cut radiated with UVA |        |         |
|------|------------------------------------|-------|---------------------------|--------|---------|
|      |                                    |       | 0 min                     | 60 min | 360 min |
| 1    | 5-CQA                              | 7.73  | 13.98                     | 18.55  | 29.67   |
| 2    | <i>p</i> -HBA                      | nd*   | nd                        | nd     | 0.37    |
| 3    | <i>p</i> -coumaric acid derivative | nd    | nd                        | nd     | nd      |
| 4    | FA                                 | 1.57  | 1.73                      | 2.17   | 2.36    |
| 5    | 3,5-diCQA                          | nd    | nd                        | nd     | 4.60    |
| 6    | 4,5-diCQA                          | 4.93  | 5.35                      | 5.74   | 6.85    |
| 7    | HBA Derivative                     | nd    | nd                        | nd     | nd      |
| 8    | Isocoumarin                        | 0.05  | 0.11                      | 0.10   | 0.12    |

\* nd = not detected

**Table S3.** Individual phenolic content (mg/100g) of non-wounded and carrot pies exposed to UVB (10.4 W/m<sup>2</sup>). Quantification was based on HPLC profile at 280 nm. Measurements were taken after 4 d storage at 15°C.

| Peak | Compound                           | Whole | Pie-cut radiated with UVB |        |         |
|------|------------------------------------|-------|---------------------------|--------|---------|
|      |                                    |       | 0 min                     | 60 min | 360 min |
| 1    | 5-CQA                              | 7.82  | 13.15                     | 38.84  | 70.63   |
| 2    | <i>p</i> -HBA                      | nd*   | nd                        | nd     | nd      |
| 3    | <i>p</i> -coumaric acid derivative | nd    | nd                        | 0.33   | 0.38    |
| 4    | FA                                 | 1.59  | 1.90                      | 2.68   | 3.28    |
| 5    | 3,5-diCQA                          | nd    | nd                        | nd     | 4.56    |
| 6    | 4,5-diCQA                          | 4.95  | 6.42                      | 7.95   | 13.33   |
| 7    | HBA derivative                     | nd    | nd                        | nd     | 1.03    |
| 8    | Isocoumarin                        | 0.04  | 0.06                      | 0.31   | 1.56    |

\* nd = not detected
